# Supplementary material for: Carbon-11 carboxylation of trialkoxysilane and trimethylsilane derivatives using [ 11 C]CO 2
Source: Royal Society of Chemistry journal article supplement (doi:10.1039/d0cc00449a), 2020-01-01
Supplement: d0cc00449a1.pdf [file d0cc00449a1.pdf]

# Carbon-11 carboxylation of trialkoxysilane and trimethylsilane derivatives using [<sup>11</sup>C]CO<sub>2</sub>

Salvatore Bongarzone,<sup>a</sup> Nicola Raucci,<sup>a</sup> Igor Camargo Fontana,<sup>a</sup>  
Federico Luzi<sup>a</sup> and Antony D. Gee<sup>a</sup>

<sup>a</sup>School of Biomedical Engineering & Imaging Sciences, King's College London, King's Health Partners, St Thomas' Hospital, London SE1 7EH, United Kingdom

## Supplementary Information

### Table of Contents

|                                                                                    |          |
|------------------------------------------------------------------------------------|----------|
| <b>General Method and Materials</b> .....                                          | <b>2</b> |
| <b>Carbon-11 Radiochemistry</b> .....                                              | <b>2</b> |
| <b>[<sup>11</sup>C]CO<sub>2</sub> Production</b> .....                             | <b>2</b> |
| <b>Description of the system</b> .....                                             | <b>2</b> |
| <b>Description of the carbon-11 carboxylation</b> .....                            | <b>3</b> |
| <b>Molar Activity calculation of [<sup>11</sup>C]1</b> .....                       | <b>3</b> |
| <b>Description of the carbon-11 methylation to obtain [<sup>11</sup>C]7</b> .....  | <b>3</b> |
| <b>Quality control of compounds [<sup>11</sup>C]1-[<sup>11</sup>C]7</b> .....      | <b>4</b> |
| <b>Semipreparative HPLC method for the purification of [<sup>11</sup>C]1</b> ..... | <b>5</b> |
| <b>Fig. S1</b> .....                                                               | <b>5</b> |
| <b>Fig. S2</b> .....                                                               | <b>5</b> |
| <b>Fig. S3</b> .....                                                               | <b>6</b> |

## General Method and Materials

2-Thiophencarboxylic acid (**1**, 99%), benzoic acid (**2**, 99%), toluic acid (**3**, 99%), fluorene-9-carboxylic acid (**4**, 96%), phenylpropionic acid (**5**, 99%), 4-chlorobenzoic acid (**6**, 99%), 2-methylthiophene (**7**, 99%), trimethyl-2-thienylsilane (**1a**, 97%), triethoxy-2-thienylsilane (**1b**, 97%), trimethyl(phenyl)silane (**2a**, 99%), triethoxy(phenyl)silane (**2b**, 98%), trimethyl-p-tolylsilane (**3a**, 97%), triethoxy-p-tolylsilane (**3b**, 97%), 9-trimethylsilylfluorene (**4a**, 98%), 1-phenyl-2-trimethylsilylacetylene (**5a**, 99%), 1-chloro-4(trimethylsilyl)benzene (**6a**, 98%), potassium fluoride (KF, 99%), 4,7,13,16,21,24-hexaoxa-1,10-diazabicyclo[8.8.8]hexacosane (K2.2.2, 99%), 2-*tert*-butylimino-2-diethylamino-1,3-dimethylperhydro-1,3,2-diazaphosphorine (BEMP, 98%), cesium fluoride (CsF, 99%), 1,4,7,10,13,16-hexaoxacyclooctadecane (18-crown-6, 99%), copper(I) iodide (99%), *N,N*-dimethylformamide (DMF, 99%), 1,8-diazabicyclo[5.4.0]undec-7-ene (DBU, 98%), tetrahydrofuran (THF, 99%), trifluoroacetic acid (TFA, 99%), acetonitrile (MeCN, for HPLC  $\geq 99\%$ ). All chemicals and dry solvents were purchased from Sigma-Aldrich, Alfa Aesar, Merck, Fisher Scientific and Acros Organics. TE, RCP, RCY and molar activity values are reported as mean  $\pm$  standard deviation.

## Carbon-11 Radiochemistry

### Preparation of the Vial

An oven-dried vial (KX Microwave Vials, 5 mL) and a crimp cap (Fisherbrand, centre hole with 3.0 mm PTFE seal aluminium silver 20 mm, part # 10132712) were used. The vials were prepared in a glovebox (Plas-Labs, Inc. 815 PGB Series) under nitrogen atmosphere and controlled CO<sub>2</sub> levels (lower than 30 ppm).

### [<sup>11</sup>C]CO<sub>2</sub> Production

[<sup>11</sup>C]CO<sub>2</sub> was produced using a Siemens RD112 cyclotron by the 11 MeV proton bombardment of nitrogen (+0.5% O<sub>2</sub>) gas via the <sup>14</sup>N(p, $\alpha$ )<sup>11</sup>C reaction. The cyclotron-produced [<sup>11</sup>C]CO<sub>2</sub> was bubbled in a stream of helium gas with a flow rate of 60 mL/min post target depressurisation directly into a reaction v-vial (time from end of bombardment (EOB) to end of delivery (EOD) = 1 minute and 50 seconds).

### Description of the system

The set up was implemented on an Eckert & Ziegler system (Modular-Lab Standard) and included two switching valves and a heating block. All gas transfer lines were fabricated from PTFE tubing (length: 10–30 cm, O.D.: 0.79 x 0.4 in., I.D.: 1/32 x 0.16 in.). A P<sub>2</sub>O<sub>5</sub> trap and one-way valve (BRAUN, normally closed backcheck valve, part # 415062) were placed before the vial. The outlet gas line of the vial was connected to a cartridge (Biosys Solutions Ltd, Fritted Empty MiniSpeed Cartridges, part # 2447) filled with ascarite<sup>®</sup> (Sigma-Aldrich, 1310-73-2) to trap unreacted [<sup>11</sup>C]CO<sub>2</sub>. A tedlar<sup>®</sup> gas waste bag was placed at the outlet of the ascarite's cartridge to prevent any gaseous emission.

### Description of the carbon-11 carboxylation

A cyclotron beam current of 5  $\mu\text{A}$  was maintained for a bombardment time of 1 minute for all reaction optimization experiments producing  $\sim 300$  MBq of carbon-11 at EOD.

$[^{11}\text{C}]\text{CO}_2$  (carried by helium gas) was bubbled directly from the target into a reaction vial containing aryltrimethylsilane or aryltrialkoxysilanes and reagents described in **Tables 1-3** at 0  $^\circ\text{C}$ . The outlet gas line of the vial was connected to an Ascarite<sup>®</sup> cartridge. After the delivery of  $[^{11}\text{C}]\text{CO}_2$  (1.75 minutes from end of bombardment) the temperature was increased to 30, 70, 100, 140  $^\circ\text{C}$  for 2.5-5 minutes. At five minutes, the system was flushed with helium (60 ml/min) for 20 seconds. Thereafter, the reaction was cooled at 0  $^\circ\text{C}$  and quenched with a solution of 0.5% trifluoroacetic acid TFA ( $\text{CF}_3\text{COOH}$ ) in MeCN/ $\text{H}_2\text{O}$  (1:1, 1 mL). The amount of radioactivity in the Ascarite<sup>®</sup> and vial were measured (to determine the trapping efficiency, TE), and an aliquot of the crude mixture analysed by radio-HPLC to determine the radiochemical purity, RCP.

### Molar Activity calculation of $[^{11}\text{C}]\mathbf{1}$

Eleven samples of **1** at different concentrations (1.15-0.011  $\mu\text{mol/mL}$ ) were analysed by HPLC to obtain a calibration curve of the peak area (mAU\*s) versus  $\mu\text{mol/mL}$ . The peak areas of **1** were averaged and plotted in function of the corresponding  $\mu\text{mol/mL}$  (**Figure S2**).

$[^{11}\text{C}]\mathbf{1}$  was produced following the procedure of entry 2 (**Table 2**) by starting from  $2.30 \pm 0.3$  GBq of  $[^{11}\text{C}]\text{CO}_2$ . After quenching the reaction,  $[^{11}\text{C}]\mathbf{1}$  was purified by semipreparative HPLC and the peak corresponding to  $[^{11}\text{C}]\mathbf{1}$  collected.

The radioactivity in 1.00 mL of solution containing the purified  $[^{11}\text{C}]\mathbf{1}$  was determined. An aliquot of purified  $[^{11}\text{C}]\mathbf{1}$  (20  $\mu\text{L}$ ) was analysed by analytical radio-HPLC (**Figure S3**) and the UV peak corresponding to **1** was integrated. The area of the UV peak was used to determine the  $\mu\text{mol/mL}$  of the associated  $^{12}\text{C}$ -carrier content for  $[^{11}\text{C}]\mathbf{1}$  from the equation of the calibration curve. The molar activity ( $A_m$ ) of  $[^{11}\text{C}]\mathbf{1}$  was calculated to be  $3.1 \pm 0.4$  GBq/ $\mu\text{mol}$  at EOD ( $n = 3$ ).

### Description of the carbon-11 methylation to obtain $[^{11}\text{C}]\mathbf{7}$

The  $[^{11}\text{C}]\text{CO}_2$  was transferred in a stream of helium at 70 mL/min to a GE TRCAERLab<sup>®</sup> FX MeI module ( $t_{\text{delivery}} = 1.75$  minutes).  $[^{11}\text{C}]\text{CH}_3\text{I}$  was produced by gas phase conversion from  $[^{11}\text{C}]\text{CO}_2$  and transferred in a vial containing 1 mL of DMSO.

A DMSO solution of  $[^{11}\text{C}]\text{CH}_3\text{I}$  (2-4 MBq) was transferred into a reaction vial containing **1a** (0.1 mmol, 1 equiv.), KF (0.25 equiv.), K2.2.2, (0.25 equiv.), BEMP (0.6 equiv.) and CuI (10%) in 500  $\mu\text{L}$  of DMF at 0  $^\circ\text{C}$ . The temperature was then increased to 140  $^\circ\text{C}$  for 5 minutes. Thereafter, the reaction was cooled at 0  $^\circ\text{C}$  and quenched with a solution of 0.5% TFA in MeCN/ $\text{H}_2\text{O}$  1:1. An aliquot of the crude mixture analysed by radio-HPLC to determine the radiochemical purity (RCP).

### Quality control of compounds [<sup>11</sup>C]1-[<sup>11</sup>C]7

HPLC analysis was performed on an Agilent 1200 system equipped with a UV detector ( $\lambda=254$  nm) and a  $\beta+$ -flow detector coupled in series. A reverse-phase column (Phenomenex Luna-C18, 4.6 x 150 mm, 5  $\mu$ m) was used with a flow rate of 1 mL/min.

Identification of all radioactive products was confirmed by co-elution of ([<sup>11</sup>C]1-[<sup>11</sup>C]7) with the corresponding non-radioactive compounds (1-7).

### Compounds [<sup>11</sup>C]1 and [<sup>11</sup>C]7

The HPLC method was isocratic between 0-5.5 minutes (CH<sub>3</sub>CN + 0.5% TFA: H<sub>2</sub>O + 0.5% TFA, 25:75), gradient between 5.5-6 minutes (25:75 to 0:100), isocratic between 6-9 minutes (0:100), gradient between 9-10 minutes (0:100 to 25:75), isocratic between 10-13 minutes (25:75). [<sup>11</sup>C]1  $t_R$ = 5 minutes and 20 seconds (**Figure S1**).

[<sup>11</sup>C]7  $t_R$ = 8 minutes and 40 seconds.

### Compound [<sup>11</sup>C]2

The HPLC method was isocratic between 0-9 minutes (CH<sub>3</sub>CN + 0.5% TFA: H<sub>2</sub>O + 0.5% TFA, 25:75), gradient between 9-10 minutes (25:75 to 0:100), isocratic between 10-13 minutes (0:100), gradient between 13-14 minutes (0:100 to 25:75) and isocratic between 14-17 minutes (25:75).

$t_R$ = 7 minutes and 30 seconds.

### Compounds [<sup>11</sup>C]3 and [<sup>11</sup>C]5

The HPLC method was isocratic between 0-5.5 minutes (CH<sub>3</sub>CN + 0.5% TFA: H<sub>2</sub>O + 0.5% TFA, 35:65), gradient between 5.5-9 minutes (35:65 to 0:100), isocratic between 9-12 minutes (0:100), gradient between 12-13 minutes (0:100 to 35:65), isocratic between 13-16 minutes (35:65).

[<sup>11</sup>C]3:  $t_R$ = 6 minutes and 20 seconds.

[<sup>11</sup>C]5:  $t_R$ = 7 minutes and 7 seconds.

### Compound [<sup>11</sup>C]4

The HPLC method was isocratic between 0-5.5 minutes (CH<sub>3</sub>CN + 0.5% TFA: H<sub>2</sub>O + 0.5% TFA, 50:50), gradient between 5.5-9 minutes (50:50 to 0:100), isocratic between 9-12 minutes (0:100), gradient between 12-13 minutes (0:100 to 50:50), isocratic between 13-16 minutes (50:50).

$t_R$ = 5 minutes and 46 seconds.

### Compound [<sup>11</sup>C]6

The HPLC method was isocratic between 0-5.5 minutes (CH<sub>3</sub>CN + 0.5% TFA: H<sub>2</sub>O + 0.5% TFA, 45:55), gradient between 5.5-9 minutes (45:55 to 0:100), isocratic between 9-12 minutes isocratic (0:100), gradient between 12-13 minutes (0:100 to 45:55), isocratic between 13-16 minutes (45:55).

$t_R$ = 5 minutes and 30 seconds.

### Semipreparative HPLC method for the purification of [<sup>11</sup>C]1.

HPLC analysis was performed on an Agilent 1200 system equipped with a UV detector ( $\lambda=254$  nm) and a  $\beta^+$ -flow detector coupled in series. A reverse-phase column (Phenomenex Luna-C18, 10 x 250 mm, 5  $\mu$ m) was used with a flow rate of 4 mL/min.

The HPLC method was isocratic between 0 – 10.4 minutes (CH<sub>3</sub>CN + 0.5% TFA: H<sub>2</sub>O + 0.5% TFA, 25:75), gradient between 10.4-11.8 minutes (25:75 to 0:100), isocratic between 11.8-17.7 minutes (0:100), gradient between 17.7-19.69 minutes (0:100 to 25:75), isocratic between 19.69-26 minutes (25:75).  $t_R = 11$  minutes and 48 seconds.

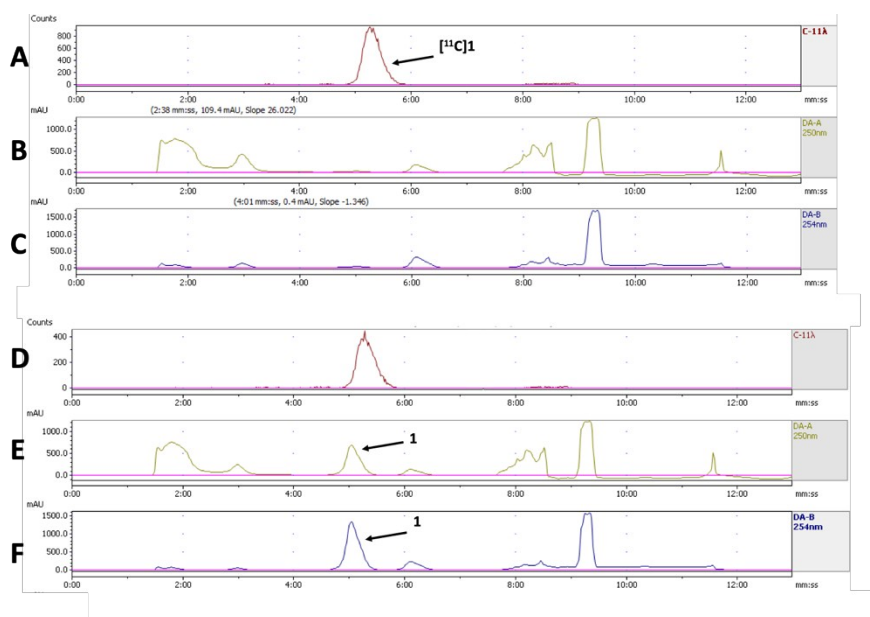

**Fig. S1** A) Radio-HPLC chromatogram of crude [<sup>11</sup>C]1 (experiment Table 1 entry 2). B and C) UV chromatograms of crude [<sup>11</sup>C]1 at 250 and 254 nm, respectively. D) Radio-HPLC chromatogram of crude [<sup>11</sup>C]1 co-injected with 1. E and F) UV chromatograms of crude [<sup>11</sup>C]1 co-injected with 1 at 250 and 254 nm, respectively. The difference between UV peaks (retention time ( $t_R$ ) = 5 minutes and 7 seconds) and radioactivity peaks ( $t_R$  = 5 minutes and 20 seconds) is 13 seconds, consistent with the expected delay time between detectors (13 seconds).

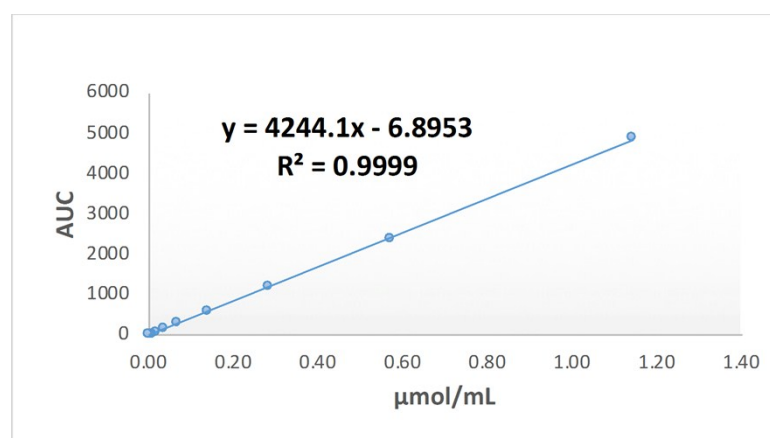

**Fig. S2** Calibration Curve for 1.

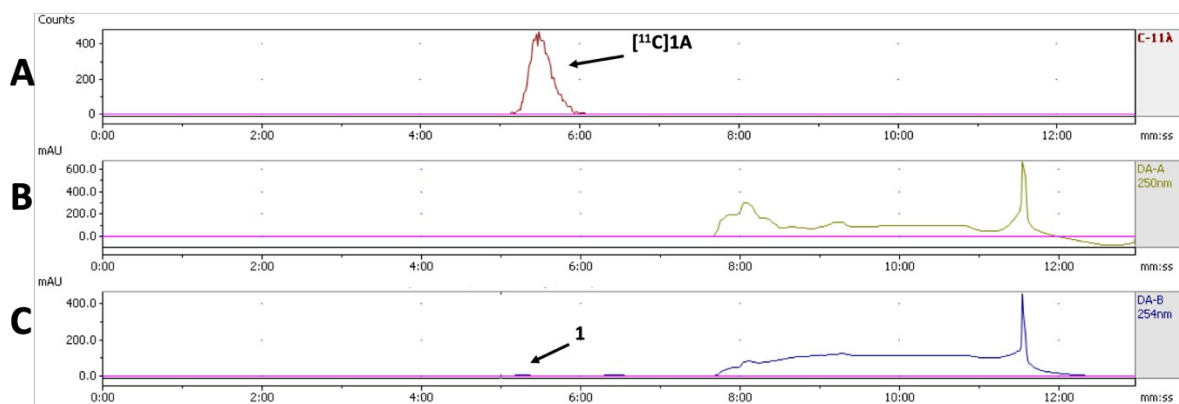

**Fig. S3** A) Radio-HPLC chromatogram of purified  $[^{11}\text{C}]1$ .  $[^{11}\text{C}]1$  has been purified by semipreparative HPLC column. B and C) UV chromatograms of HPLC-purified  $[^{11}\text{C}]1$  at 250 and 254 nm, respectively. The difference between UV peaks (retention time ( $t_R$ ) = 5 minutes and 15 seconds) and radioactivity peaks ( $t_R$  = 5 minutes and 28 seconds) is 13 seconds consistent with the expected delay time between detectors (13 seconds).
